# Supplementary material for: Chemo-Enzymatic Production of 4-Nitrophenyl-2-acetamido-2-deoxy-α-D-galactopyranoside Using Immobilized β-N-Acetylhexosaminidase
Source: MDPI journal article supplement (doi:10.3390/catal12050474), 2022-04-23
Supplement: s1 [file s1]

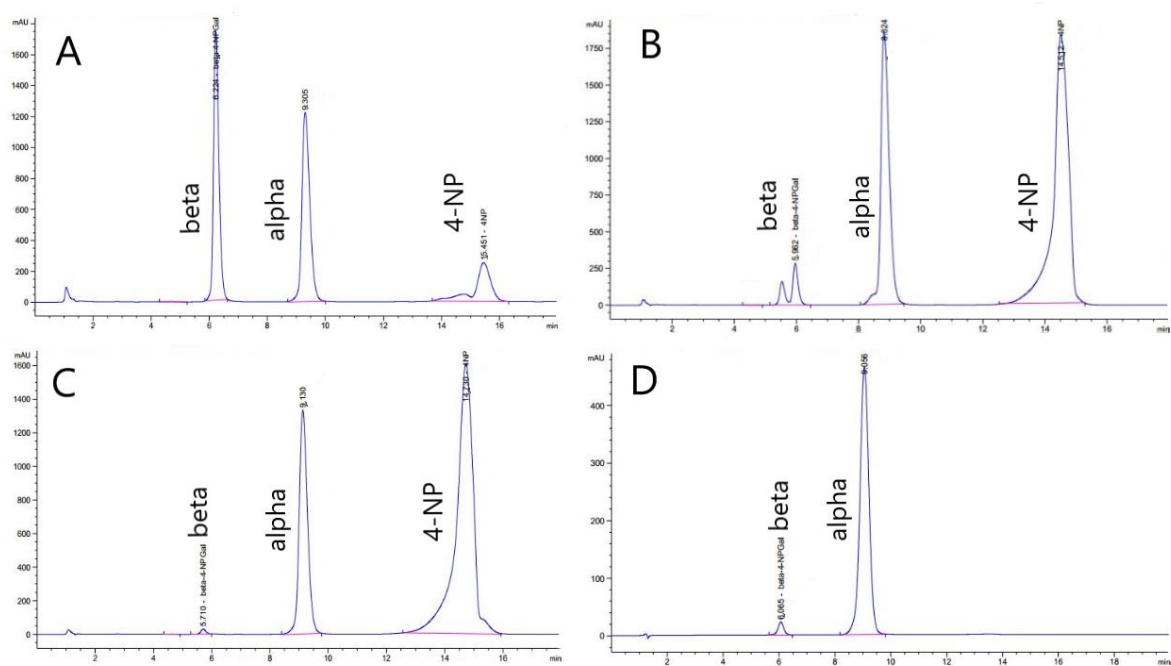

Figure S1. The HPLC chromatograms of samples taken from enzymatic hydrolysis of 4-NP- $\alpha/\beta$ -GalNAc in crystal suspensions; A: at 0 min, (beta) 4-NP- $\beta$ -GalNAc, (alpha) 4-NP- $\alpha$ -GalNAc, (4-NP) 4-nitrophenol; B: at 1 h; C: at 4 h; D: sample of crystals after isolation.
