# Supplementary material for: Chemo-Enzymatic Production of 4-Nitrophenyl-2-acetamido-2-deoxy-α-D-galactopyranoside Using Immobilized β-N-Acetylhexosaminidase
Source: MDPI journal article supplement (doi:10.3390/catal12050474), 2022-04-23
Supplement: s1 [file s1]

Archive with 1 entries (1 files):
- catalysts-1655327-supplementary.pdf
